# Supplementary material for: Colorimetric assay for parallel detection of Cd2+, Ni2+and Co2+using peptide-modified gold nanoparticles
Source: Royal Society of Chemistry journal article supplement (doi:10.1039/c1an15909g), 2011-12-08
Supplement: c1an15909g.pdf [file c1an15909g.pdf]

## Supporting Information

### Colorimetric assay for simultaneous detection of $\text{Cd}^{2+}$ , $\text{Ni}^{2+}$ and $\text{Co}^{2+}$ using peptide-modified gold nanoparticles

Min Zhang, Yu-Qiang Liu and Bang-Ce Ye\*

5

Lab of Biosystems and Microanalysis, State Key Laboratory of Bioreactor Engineering, East China University of Science and Technology, Meilong RD 130, Shanghai, 200237, People's Republic of China.

*Table S1* The information of peptides indicated in this work

| Sequence    | *Information                                                              |
|-------------|---------------------------------------------------------------------------|
| CALNN       | Number of amino acids: 5; Molecular weight: 533.6; Theoretical pI: 5.52   |
| CALNNDHHHHH | Number of amino acids: 12; Molecular weight: 1471.5; Theoretical pI: 6.62 |

10 \*Tools via the website: <http://web.expasy.org/protparam/>

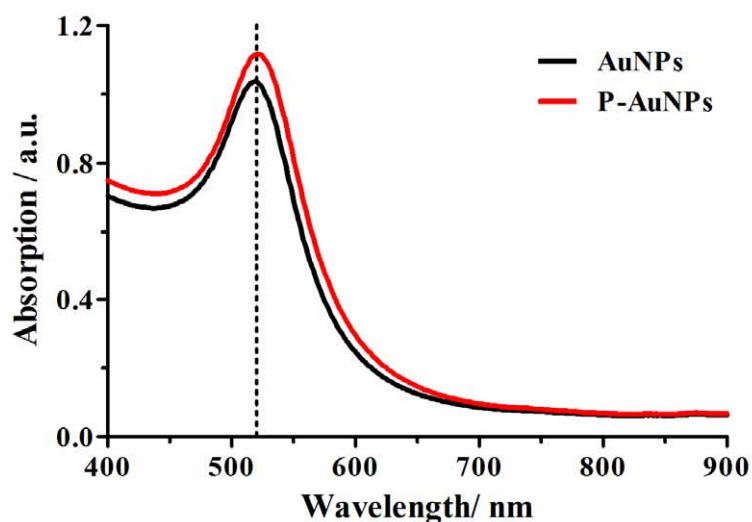

*Figure S1* UV-vis absorption spectra of the unmodified citrate-AuNPs (AuNPs) and peptide-modified AuNPs (P-AuNPs).

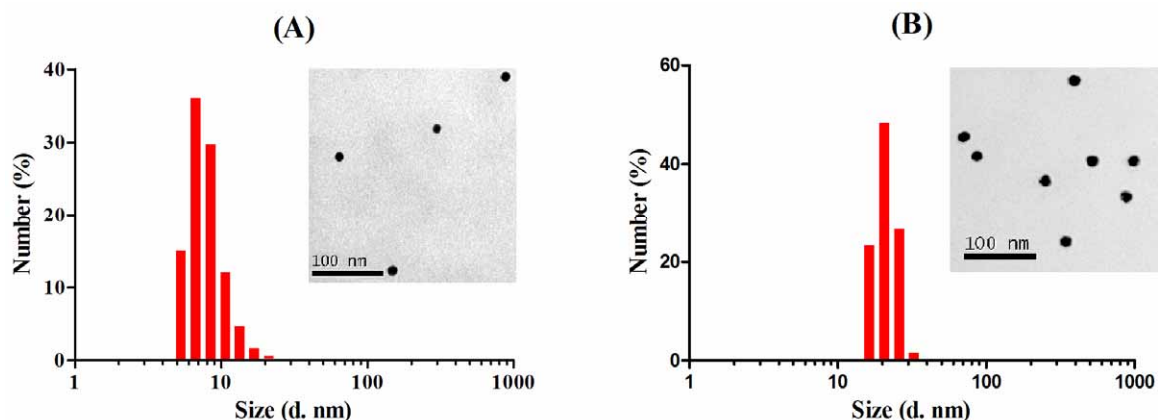

**Figure S2** Histograms of size distribution of (A) the unmodified citrate-AuNPs (AuNPs) and (B) peptide-modified AuNPs (P-AuNPs) characterized by dynamic light scattering (DLS) measurement. Insets: the corresponding transmission electron microscope (TEM) images.

5

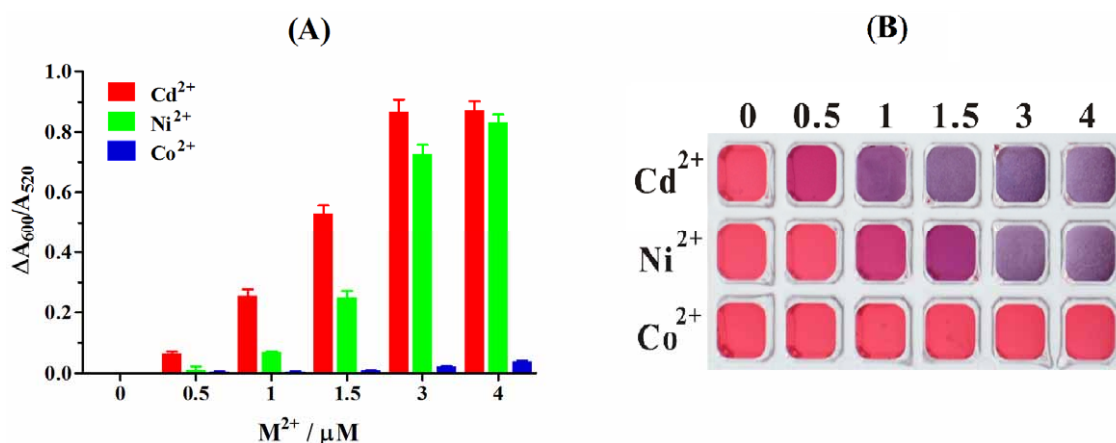

**Figure S3** (A) Bars represent the changes in absorption ratios of P-AuNPs ( $\Delta A_{600}/A_{520}$ ) corresponding to the  $Cd^{2+}$ ,  $Ni^{2+}$  and  $Co^{2+}$  concentration in the range 0–4.0  $\mu M$ , respectively. (B) Direct observation of the color change of P-AuNPs corresponding to the  $Cd^{2+}$ ,  $Ni^{2+}$  and  $Co^{2+}$  concentration in the range 10 0–4.0  $\mu M$ .

**Table S2.** Determination of  $Cd^{2+}$  in real samples

| Sample      | Added ( $\mu M$ ) | Found ( $\mu M$ ) | Recovery (%) |
|-------------|-------------------|-------------------|--------------|
| Tap water   | 0.60              | 0.58              | 96.67        |
|             | 1.30              | 1.39              | 106.92       |
| River water | 0.60              | 0.64              | 106.67       |
|             | 1.30              | 1.38              | 106.15       |

**Table S3.** Determination of Ni<sup>2+</sup> in real samples

| Sample      | Added (μM) | Found (μM) | Recovery (%) |
|-------------|------------|------------|--------------|
| Tap water   | 1.20       | 1.27       | 105.83       |
|             | 2.00       | 2.12       | 106.00       |
| River water | 1.20       | 1.15       | 95.83        |
|             | 2.00       | 1.94       | 97.00        |

5

**Table S4.** Determination of Co<sup>2+</sup> in real samples

| Sample      | Added (μM) | Found (μM) | Recovery (%) |
|-------------|------------|------------|--------------|
| Tap water   | 6.00       | 6.53       | 108.83       |
|             | 9.00       | 9.57       | 106.33       |
| River water | 6.00       | 6.41       | 106.83       |
|             | 9.00       | 9.71       | 107.89       |
